# Supplementary material for: Arrestin domain containing 3 promotes Helicobacter pylori–associated gastritis by regulating protease-activated receptor 1
Source: PubMed Central journal article supplement (PMC7455081; doi:10.1172/jci.insight.135849), 2020-08-06
Supplement: jciinsight-5-135849-s100.pdf [file jciinsight-5-135849-s100.pdf]

1 Supplemental Figure 1

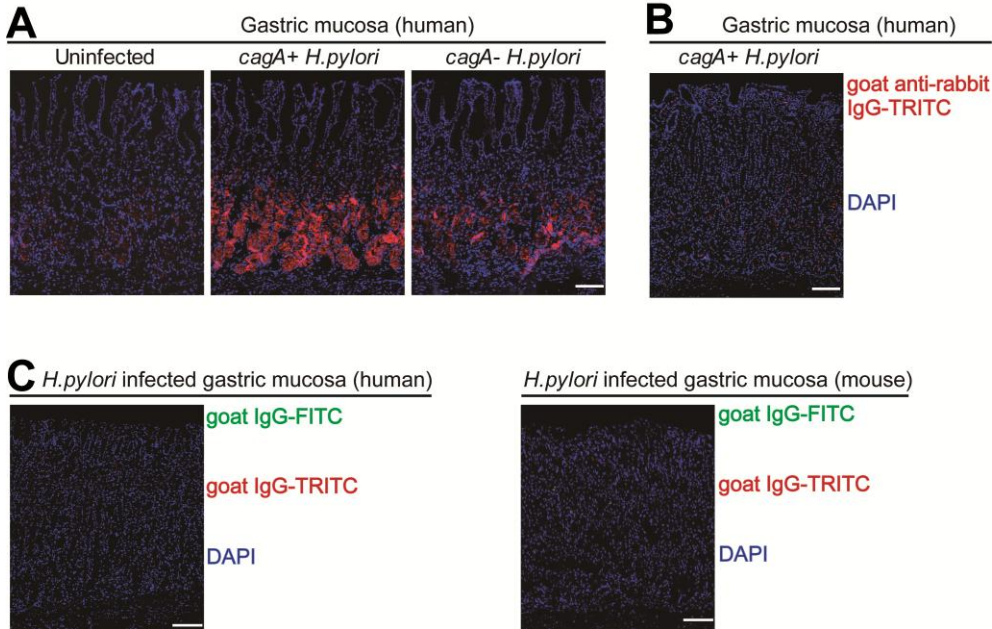

2  
3 ARRDC3 is increased in gastric mucosa of *H. pylori*-infected patients and mice. (A) ARRDC3 expression in  
4 gastric mucosa of *cagA*<sup>+</sup> *H. pylori*-infected, *cagA*<sup>-</sup> *H. pylori*-infected, and uninfected donors was analyzed by  
5 immunofluorescence staining. Scale bars: 100 microns. (B and C) Representative immunofluorescence  
6 staining images showing only secondary antibody staining controls in gastric mucosa of *H. pylori*-infected  
7 patients or *H. pylori*-infected mice. Scale bars: 100 microns.  
8

1 Supplemental Figure 2

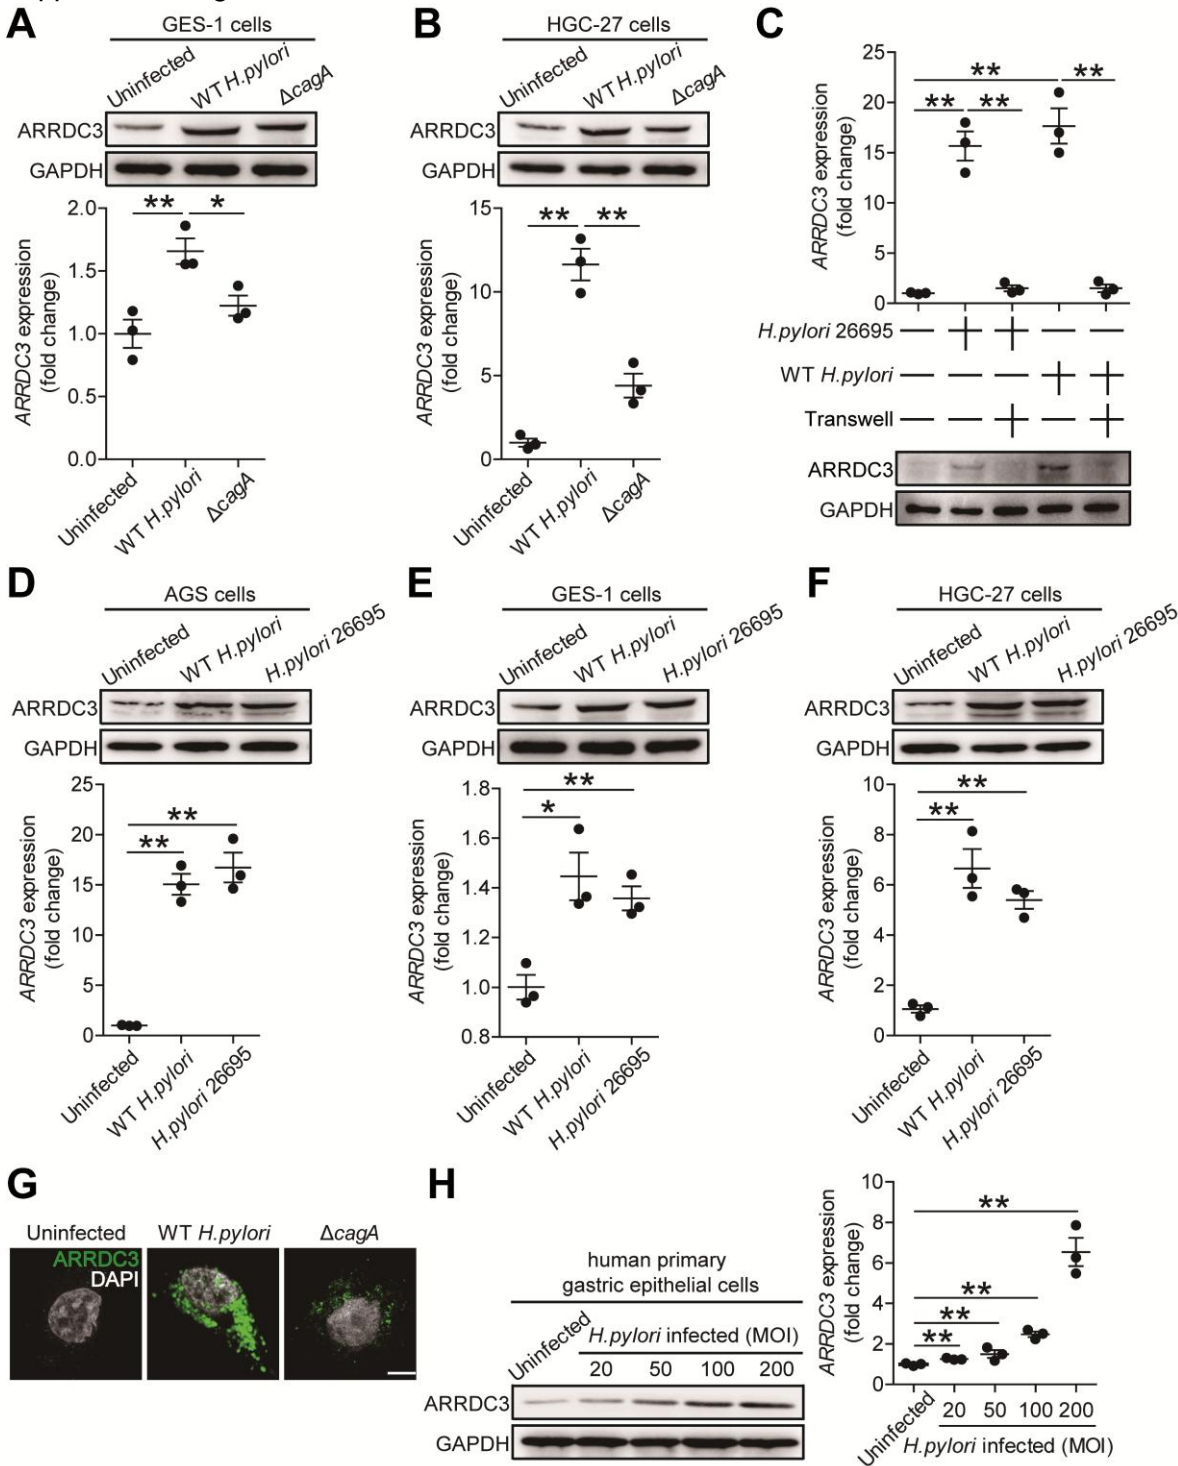

2  
3 *H. pylori* stimulates gastric epithelial cells express ARRDC3. (A and B) ARRDC3 expression and ARRDC3  
4 protein in WT *H. pylori*-infected,  $\Delta$ *cagA*-infected, and uninfected GES-1 cells (A) and HGC-27 cells (B)  
5 (MOI=100, 24 h) was analyzed by real-time PCR and western blot (n=3). (C) ARRDC3 expression and  
6 ARRDC3 protein in AGS cells infected with WT *H. pylori* or *H. pylori* 26695 (MOI=100, 24 h) was assessed by  
7 transwell assay and analyzed by real-time PCR and western blot (n=3) as described in Materials and Methods.  
8 (D-F) ARRDC3 expression and ARRDC3 protein in WT *H. pylori*-infected, *H. pylori* 26695-infected, and  
9 uninfected AGS cells (D), GES-1 cells (E) and HGC-27 cells (F) (MOI=100, 24 h) was analyzed by real-time  
10 PCR and western blot (n=3). (G) Representative immunofluorescence staining images showing ARRDC3  
11 expression (green) in uninfected, WT *H. pylori*-infected and  $\Delta$ *cagA*-infected AGS cells (MOI=100, 6 h). Scale  
12 bars: 1 micron. (H) ARRDC3 expression and ARRDC3 protein in WT *H. pylori*-infected and uninfected human  
13 primary gastric epithelial cells with different MOI (24 h) were analyzed by real-time PCR and western blot  
14 (n=3). Data are representative of 2 independent experiments. Data are mean  $\pm$  SEM and analyzed by 1-way  
15 ANOVA. Western blot results are run in parallel and contemporaneously. \* $P$ <0.05, \*\* $P$ <0.01 for groups  
16 connected by horizontal lines.

1 Supplemental Figure 3

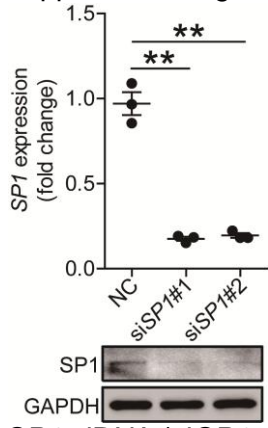

2  
3 *SP1* siRNA (siSP1#1, siSP1#2) or non-specific control siRNA (NC) pre-treated AGS cells were infected with  
4 WT *H. pylori* (MOI=100) for 24 h. *SP1* expression and SP1 protein were analyzed by real-time PCR and  
5 western blot (n=3). Data are representative of 2 independent experiments. Data are mean  $\pm$  SEM and  
6 analyzed by 1-way ANOVA. Western blot results are run in parallel and contemporaneously. \* $P$ <0.05,  
7 \*\* $P$ <0.01 for groups connected by horizontal lines.

1 Supplemental Figure 4

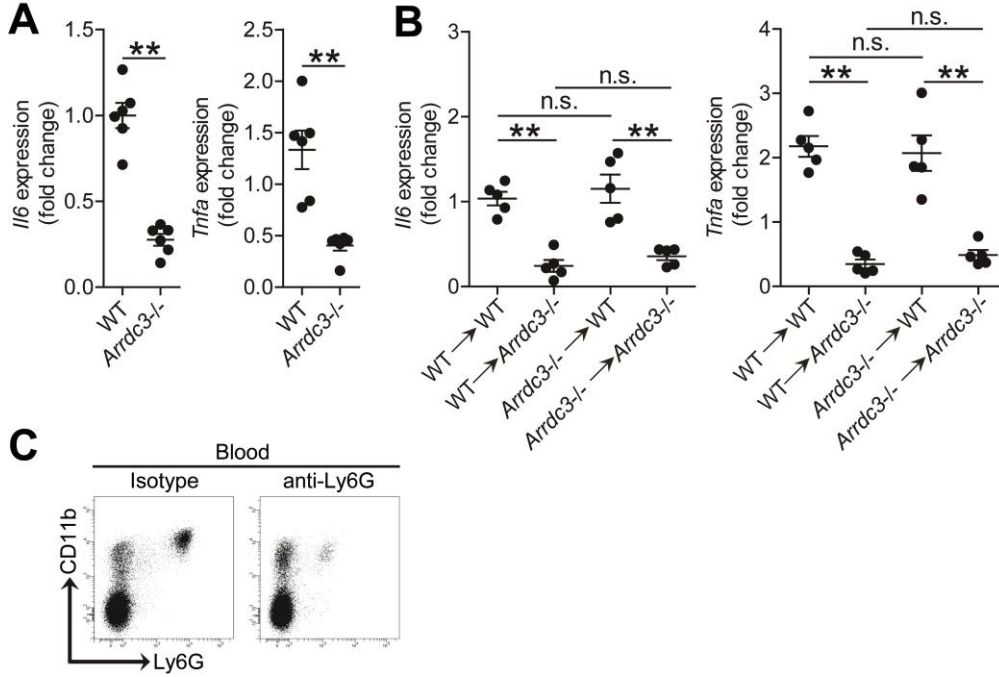

2  
3 ARRDC3 promotes *Il6* and *Tnfa* expression during *H. pylori* infection. (A and B) *Il6* and *Tnfa* expression in  
4 gastric mucosa of WT *H. pylori*-infected WT and *Arrdc3*<sup>-/-</sup> mice (n=6) (A), or in gastric mucosa of WT *H.*  
5 *pylori*-infected BM chimera mice (n=5) (B) on day 28 p.i. was compared. (C) Neutrophil depletion was  
6 confirmed by flow cytometric analysis of whole blood. Data are representative of 2 independent experiments.  
7 Data are mean ± SEM and analyzed by Student *t* test, Mann-Whitney U test and 1-way ANOVA. \**P*<0.05,  
8 \*\**P*<0.01, n.s. *P*>0.05 for groups connected by horizontal lines.  
9

1 Supplemental Figure 5

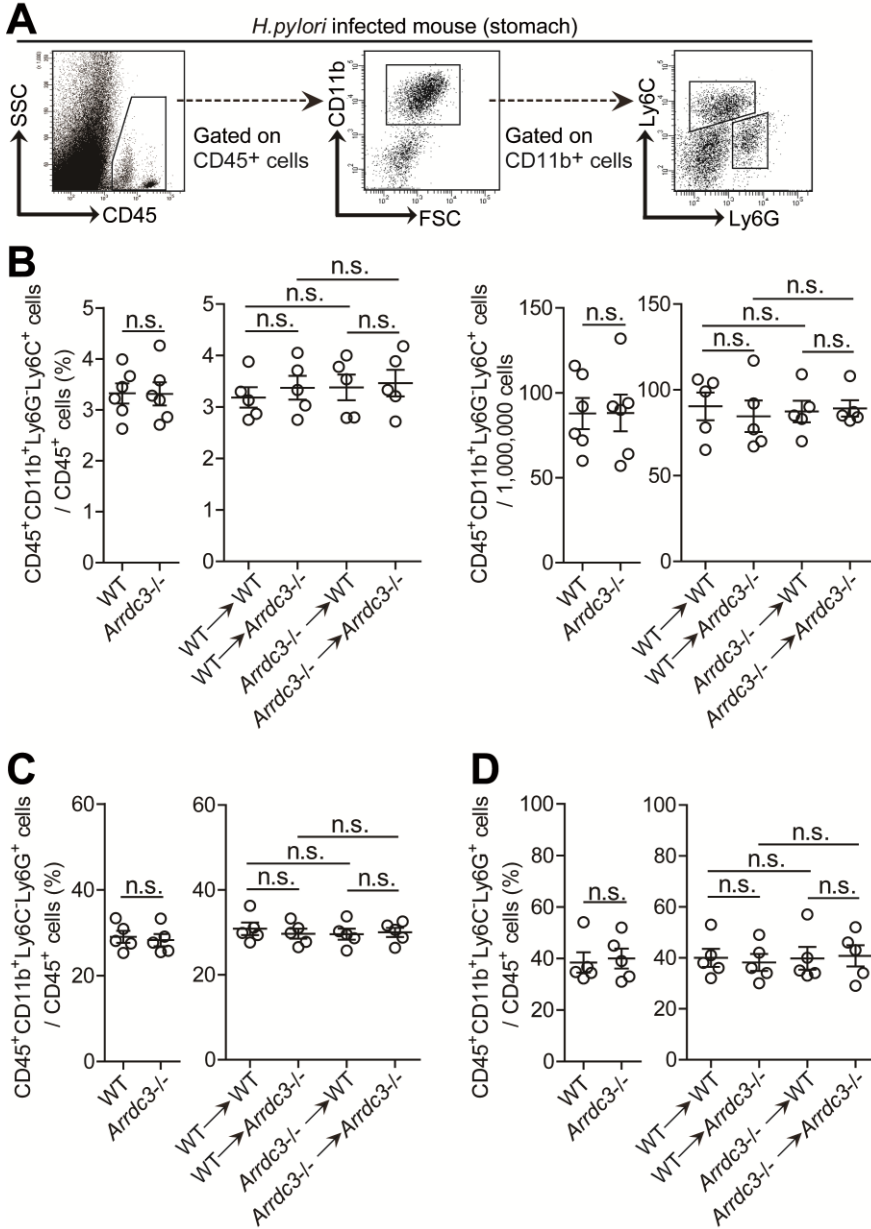

2  
3 ARRDC3 has no effect on monocyte accumulation during *H. pylori* infection. (A) Dot plots of  
4 CD45<sup>+</sup>CD11b<sup>+</sup>Ly6C<sup>+</sup>Ly6G<sup>+</sup> neutrophils and CD45<sup>+</sup>CD11b<sup>+</sup>Ly6G<sup>+</sup>Ly6C<sup>+</sup> monocytes by gating on CD45<sup>+</sup> cells  
5 and following CD11b<sup>+</sup> cells in gastric mucosa of WT *H. pylori*-infected mice on day 28 p.i.. (B)  
6 CD45<sup>+</sup>CD11b<sup>+</sup>Ly6G<sup>+</sup>Ly6C<sup>+</sup> monocyte level in gastric mucosa of WT *H. pylori*-infected WT and *Arrdc3*<sup>-/-</sup> mice  
7 (n=6), or in gastric mucosa of WT *H. pylori*-infected BM chimera mice (n=5) on day 28 p.i. was compared. (C  
8 and D) CD45<sup>+</sup>CD11b<sup>+</sup>Ly6C<sup>+</sup>Ly6G<sup>+</sup> neutrophil level in blood (C) or bone marrow (D) of WT *H. pylori*-infected WT  
9 and *Arrdc3*<sup>-/-</sup> mice or of WT *H. pylori*-infected BM chimera mice on day 28 p.i. was compared (n=5). Data are  
10 representative of 2 independent experiments. Data are mean ± SEM and analyzed by Student *t* test,  
11 Mann-Whitney U test and 1-way ANOVA. n.s. *P*>0.05 for groups connected by horizontal lines.

1 Supplemental Figure 6

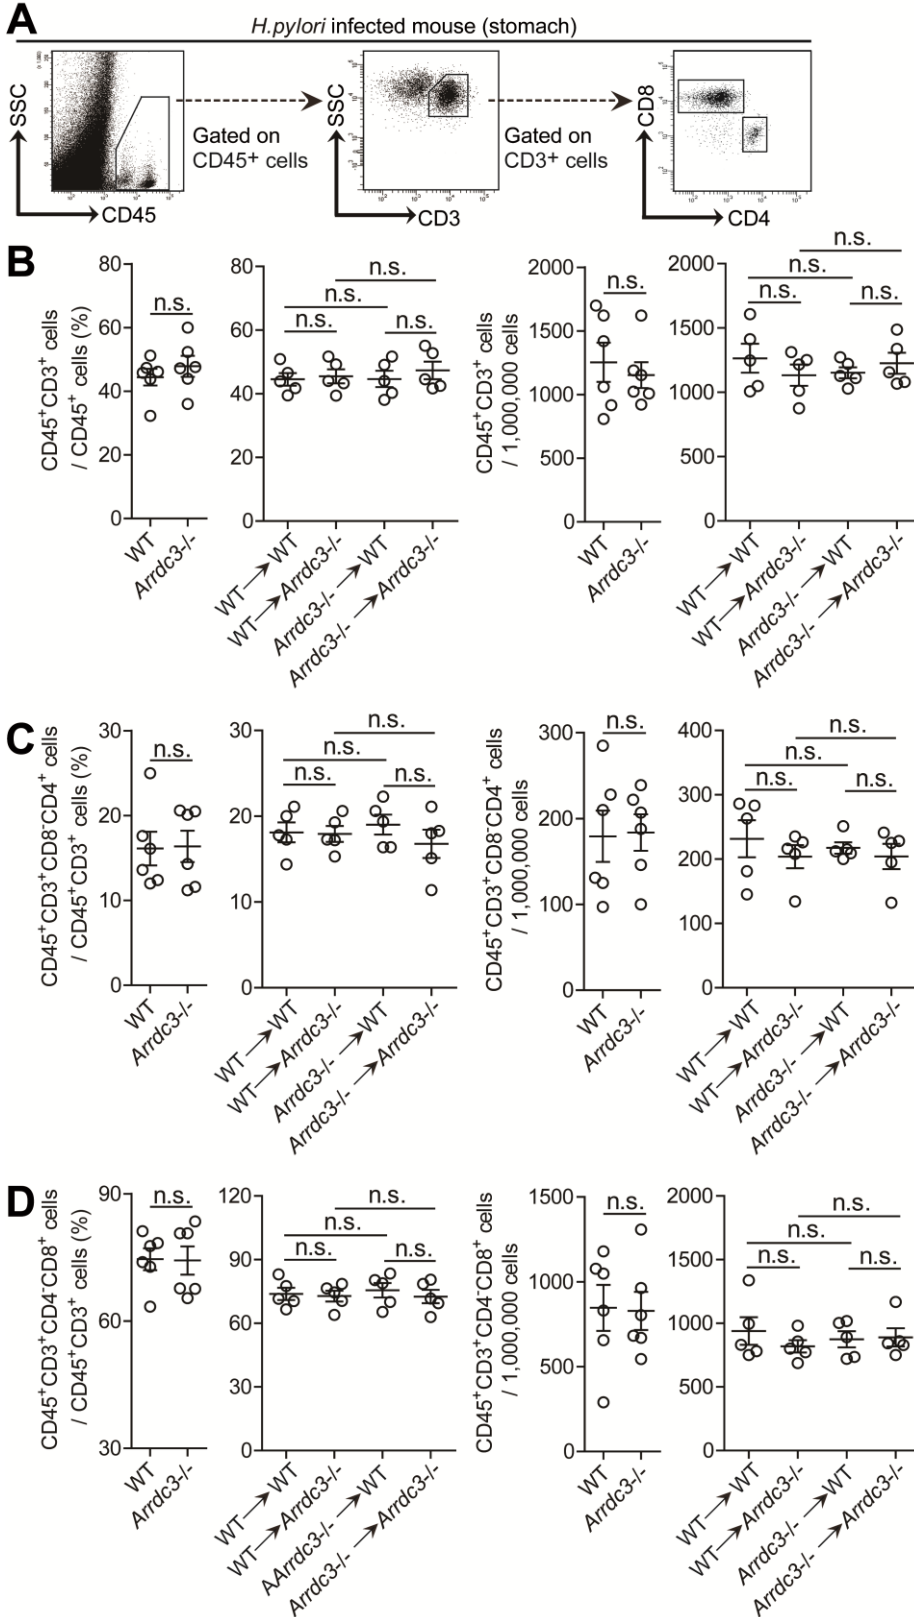

2  
3 ARRDC3 has no effect on T cell accumulation during *H. pylori* infection. (A) Dot plots of CD45<sup>+</sup>CD3<sup>+</sup> T cells,  
4 CD45<sup>+</sup>CD3<sup>+</sup>CD8<sup>+</sup>CD4<sup>+</sup> T cells and CD45<sup>+</sup>CD3<sup>+</sup>CD4<sup>+</sup>CD8<sup>+</sup> T cells by gating on CD45<sup>+</sup> cells and following  
5 CD3<sup>+</sup> cells in gastric mucosa of WT *H. pylori*-infected mice on day 28 p.i.. (B-D) CD45<sup>+</sup>CD3<sup>+</sup> T cell level (B),  
6 CD45<sup>+</sup>CD3<sup>+</sup>CD8<sup>+</sup>CD4<sup>+</sup> T cell level (C) and CD45<sup>+</sup>CD3<sup>+</sup>CD4<sup>+</sup>CD8<sup>+</sup> T cell level (D) in gastric mucosa of WT *H.*  
7 *pylori*-infected WT and *Arrdc3*<sup>-/-</sup> mice (n=6), or in gastric mucosa of WT *H. pylori*-infected BM chimera mice  
8 (n=5) on day 28 p.i. was compared. Data are representative of 2 independent experiments. Data are mean ±  
9 SEM and analyzed by Student *t* test, Mann-Whitney U test and 1-way ANOVA. n.s. *P*>0.05 for groups  
10 connected by horizontal lines.

1 Supplemental Figure 7

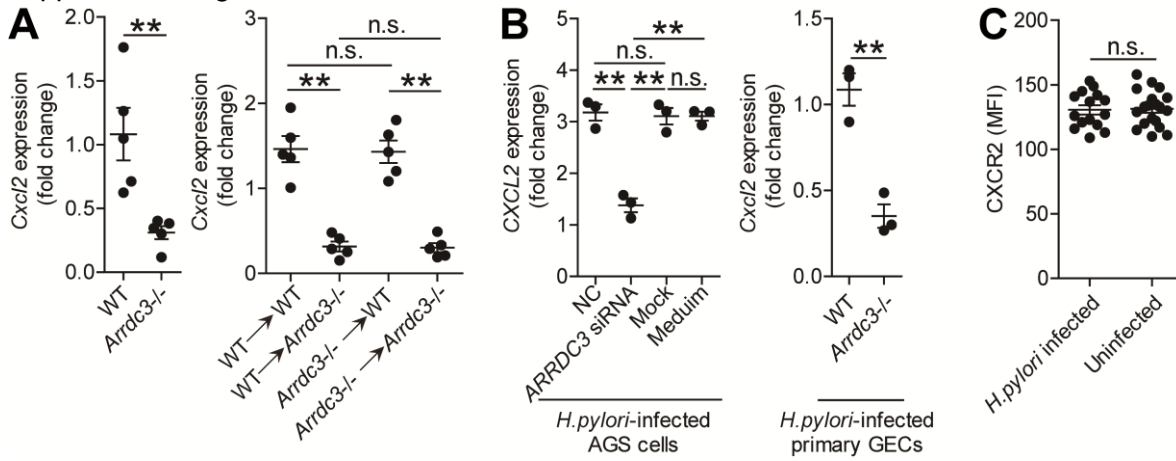

2  
3 ARRDC3 promotes *CXCL2/Cxcl2* expression in vivo and in vitro during *H. pylori* infection. (A) *Cxcl2*  
4 expression in gastric mucosa of WT *H. pylori*-infected WT and *Arrdc3*<sup>-/-</sup> mice, or in gastric mucosa of WT *H.*  
5 *pylori*-infected BM chimera mice (n=5) on day 28 p.i. was compared. (B) *ARRDC3* siRNA, non-specific control  
6 siRNA (NC), or lipo3000 only (Mock) pre-treated AGS cells or AGS cells without treatment (medium), and  
7 primary gastric epithelial cells (GECs) from uninfected WT and *Arrdc3*<sup>-/-</sup> mice were infected with WT *H. pylori*  
8 (MOI=100) for 24 h. *CXCL2/Cxcl2* expression was measured in cells by real-time PCR (n=3). (C) *CXCR2*  
9 expression on human CD45<sup>+</sup>CD11b<sup>+</sup>CD14<sup>-</sup>CD66b<sup>+</sup> neutrophils in blood of *H. pylori*-infected patients (n=15) or  
10 uninfected donors (n=19) was compared. Data are representative of 2 independent experiments. Data are  
11 mean ± SEM and analyzed by Student *t* test, Mann-Whitney U test and 1-way ANOVA. \*\**P*<0.01, n.s. *P*> 0.05  
12 for groups connected by horizontal lines. MFI, Median Fluorescence Intensity.

1 Supplemental Table 1. Clinical characteristics of patients

| Variables           | <i>H. pylori</i> -infected | Uninfected             |
|---------------------|----------------------------|------------------------|
| Age (median, range) | (41 year, 22–76 years)     | (39 year, 24–65 years) |
| Sex (male/female)   | 49/21                      | 15/12                  |

2 Exclusion criteria were: previous treatment for *H. pylori* infection, use of inhibitors of acid secretion and/or  
3 antibiotics during the 2 months before the study, use of anticoagulant drugs in the last week, gastrointestinal  
4 malignancy, severe concomitant cardiovascular, respiratory or endocrine diseases, clinically significant renal or  
5 hepatic disease, haematological disorders, previous gastro-oesophageal surgery, history of allergy to any of the  
6 drug used in the study, pregnancy or lactation, alcohol abuse, drug addiction, severe neurological or psychiatric  
7 disorders, and long-term use of corticosteroids or anti-inflammatory drugs.



## 1 Supplemental Table 2. Antibodies and other reagents

| Antibodies and reagents                                                        | Manufacturers           |
|--------------------------------------------------------------------------------|-------------------------|
| <b>Antibodies for flow cytometry</b>                                           |                         |
| anti-mouse CD45-PE-Cy7(stock no. 103113)                                       | Biologend               |
| anti-mouse CD11b-PerCP-Cy5.5(stock no. 101227)                                 | Biologend               |
| anti-mouse Ly6G-FITC(stock no. 127605)                                         | Biologend               |
| anti-mouse Ly6C-PE(stock no. 128007)                                           | Biologend               |
| anti-mouse CD3-APC(stock no. 100235)                                           | Biologend               |
| anti-mouse CD8-PerCP-Cy5.5(stock no. 100733)                                   | Biologend               |
| anti-mouse CD4-PE(stock no. 100407)                                            | Biologend               |
| anti-mouse CXCR2-APC(stock no. 149311)                                         | Biologend               |
| anti-human CD45-PE-Cy7(stock no. 368531)                                       | Biologend               |
| anti-human CD11b-PerCP-Cy5.5(stock no. 101227)                                 | Biologend               |
| anti-human CD14-PE(stock no. 367103)                                           | Biologend               |
| anti-human CD66b-FITC(stock no. 305103)                                        | Biologend               |
| anti-human CXCR2-APC(stock no. 320710)                                         | Biologend               |
| <b>Antibodies for immunohistochemical staining</b>                             |                         |
| rabbit anti-human/mouse ARRDC3(stock no. ab64817)                              | Abcam                   |
| horseradish peroxidase anti-rabbit IgG(stock no. ZDR-5307)                     | Zhongshan Biotechnology |
| <b>Antibodies for immunofluorescence</b>                                       |                         |
| rabbit anti-human/mouse ARRDC3(stock no. ab64817)                              | Abcam                   |
| mouse anti-human/mouse CD326 (EpCAM)(stock no. 323/A3)                         | Invitrogen              |
| mouse anti-human/mouse H <sup>+</sup> /K <sup>+</sup> ATPase(stock no. ab2866) | Abcam                   |
| rabbit anti-human/mouse pepsinogen II(stock no. ab180709)                      | Abcam                   |
| mouse anti-human/mouse PAR1(stock no. 611522)                                  | BD                      |
| mouse anti-human PAR1(stock no. ab233741)                                      | Abcam                   |
| LysoTracker™ Deep Red                                                          | Invitrogen              |
| goat anti-rabbit-TRITC(stock no. ZF-0316)                                      | Zhongshan Biotechnology |
| goat anti-rabbit-FITC(stock no. ZF-0311)                                       | Zhongshan Biotechnology |
| goat anti-mouse-TRITC(stock no. ZF-0313)                                       | Zhongshan Biotechnology |
| goat anti-mouse-FITC(stock no. ZF-0312)                                        | Zhongshan Biotechnology |
| <b>Antibodies for neutralizing and blocking</b>                                |                         |
| anti-human CXCL2 (Mouse IgG1)(stock no. ab89324)                               | Abcam                   |
| Mouse IgG1 Isotype Control( stock no. ab81216)                                 | Abcam                   |
| anti-human CXCR2 (Mouse IgG1)(stock no. MAB331)                                | R&D Systems             |
| Mouse IgG2a Isotype Control(stock no. MAB003)                                  | R&D Systems             |
| anti-mouse CXCL2 (Rat IgG2b)(stock no. MAB452)                                 | R&D Systems             |

|                                                   |                              |
|---------------------------------------------------|------------------------------|
| Rat IgG2b Isotype Control(stock no. MAB0061)      | R&D Systems                  |
| anti-mouse CXCR2 (Rat IgG2a)(stock no. MAB2164)   | R&D Systems                  |
| Rat IgG2a Isotype Control(stock no. MAB006)       | R&D Systems                  |
| anti-mouse Ly6G (Rat IgG2a)(stock no. 127632)     | Biologend                    |
| Rat IgG2a Isotype Control(stock no. 402301)       | Biologend                    |
| Antibodies for western blot                       |                              |
| rabbit anti-human/mouseARRDC3(stock no. ab64817)  | Abcam                        |
| rabbit anti-human ERK1/2(stock no. 4695)          | Cell signaling technology    |
| rabbit anti-human p-ERK1/2(stock no. 4370)        | Cell signaling technology    |
| rabbit anti-human AKT(stock no. 4685)             | Cell signaling technology    |
| rabbit anti-human p-AKT(stock no. 4060)           | Cell signaling technology    |
| rabbit anti-human AKT(stock no. ab214167)         | Abcam                        |
| rabbit anti-human p-AKT(stock no. ab251150)       | Abcam                        |
| rabbit anti-human JNK(stock no. ab225572)         | Abcam                        |
| rabbit anti-human p-JNK(stock no. ab239886)       | Abcam                        |
| rabbit anti-human/mouse PAR1(stock no. ab32611)   | Abcam                        |
| rabbit anti-human/mouse GAPDH(stock no. RM2002)   | Beijing Ray Antibody Biotech |
| rabbit anti-human/mouse GAPDH(stock no. ab199554) | Abcam                        |
| rabbit anti-human/mouse GAPDH(stock no. ab186930) | Abcam                        |
| Antibodies for co-immunoprecipitation             |                              |
| rabbit anti-human ARRDC3(stock no. ab64817)       | Abcam                        |
| rabbit IgG(stock no. ab172730)                    | Abcam                        |
| mouse anti-human PAR1(stock no. ab233741)         | Abcam                        |
| ELISA kits                                        |                              |
| human CXCL2                                       | Abcam                        |
| mouse CXCL2                                       | R&D Systems                  |
| mouse IL-6                                        | Abcam                        |
| mouse TNF- $\alpha$                               | Abcam                        |
| Reagents for signaling pathways inhibition        |                              |
| MEK-1 and MEK-2 inhibitorU0126                    | Merck Millipore              |
| IkBainhibitor BAY 11-7082                         | Merck Millipore              |
| JNK inhibitor SP600125                            | Merck Millipore              |
| MAPK inhibitor SB202190                           | Merck Millipore              |
| PI3K-AKT inhibitor Wortmannin                     | Merck Millipore              |
| Human CD326 microbeads                            | MiltenyiBiotec               |
| Mouse CD326 microbeads                            | MiltenyiBiotec               |
| 5- $\mu$ m pore size Transwells                   | Corning                      |

|                                                        |                   |
|--------------------------------------------------------|-------------------|
| 0.4- $\mu$ m pore size Transwells                      | Corning           |
| Collagenase IV                                         | Gibco             |
| DNase I                                                | Sigma-Aldrich     |
| DMSO                                                   | Sigma-Aldrich     |
| Bafilomycin A1                                         | Sigma-Aldrich     |
| Protein Extraction Reagent                             | Pierce            |
| SuperSignal® West Dura Extended Duration Substrate kit | Thermo            |
| Fetal bovine serum (FBS)                               | Invitrogen        |
| Penicillin/Streptomycin                                | Gibco             |
| RPMI-1640                                              | Hyclone           |
| DMEM/F12 (1:1)                                         | Hyclone           |
| Ficoll-Paque Plus                                      | GE Healthcare     |
| lyses solution                                         | TIANGEN           |
| TRIzol reagent                                         | Invitrogen        |
| Lipofectamine™ 3000 Transfection Reagent               | Invitrogen        |
| Lipofectamine™ 2000 Transfection Reagent               | Invitrogen        |
| Lipofectamine™ RNAiMAX Transfection Reagent            | Invitrogen        |
| QIAamp DNA Mini Kit                                    | QIAGEN            |
| PrimeScript™ RT reagent Kit                            | TaKaRa            |
| Real-time PCR Master Mix                               | Toyobo            |
| pGL3-basic vector                                      | Promega           |
| Dual-Luciferase Reporter assay Kit                     | Promega           |
| Pierce™ Classic Magnetic IP/Co-IP Kit                  | R&D Systems       |
| Protease inhibitor                                     | Thermo Scientific |
| Recombinant human CXCL2                                | Roche             |
| Recombinant mouse CXCL2                                | R&D Systems       |

- 
- 1 APC-Cy7, allophycocyanin-cyanin 7; PE-Cy7, phycoerythrin-cyanin 7; FITC, Fluorescein isothiocyanate; PE,
  - 2 phycoerythrin; PerCP-Cy5.5, peridinchlorophyl protein-cyanin 5.5; APC, allophycocyanin; IL, interleukin.

## 1 SupplementalTable 3.Primer and probe sequences for real-time PCR analysis

| Gene                          | Primer or probe | Sequence 5'→3'                  |
|-------------------------------|-----------------|---------------------------------|
| <i>H. pylori</i> 16s rDNA     | forward         | TTTGTTAGAGAAGATAATGACGGTATCTAAC |
|                               | reverse         | CATAGGATTTACACCTGACTGACTATC     |
|                               | probe           | CGTGCCAGCAGCCGCGGT              |
| Mouse $\beta$ 2-microglobulin | forward         | CCTGCAGAGTTAAGCATGCCAG          |
|                               | reverse         | TGCTTGATCACATGTCTCGATCC         |
|                               | probe           | TGGCCGAGCCCAAGACCGTCTAC         |
| <i>H. pyloricagA</i>          | forward         | GAGTCATAATGGCATAGAACCTGAA       |
|                               | reverse         | TTGTGCAAGAAATTCCATGAAA          |
| Mouse <i>Sry</i>              | forward         | TGGGACTGGTGACAATTGTC            |
|                               | reverse         | GAGTACAGGTGTGCAGCTCT            |
| Human <i>GAPDH</i>            | forward         | ACCCAGAAGACTGTGGATGG            |
|                               | reverse         | CAGTGAGCTTCCCGTTCAG             |
| Mouse $\beta$ -actin          | forward         | AGTGTGACGTTGACATCCGT            |
|                               | reverse         | GCAGCTCAGTAACAGTCCGC            |
| Mouse <i>Arrdc3</i>           | forward         | CCGTTTGGTAGCAGAACCTC            |
|                               | reverse         | TCCTCCGTTACAACCTCTGC            |
| Mouse <i>Ccl1</i>             | forward         | ATGGCACTGATGTGCCTGCT            |
|                               | reverse         | GGTGGAGGACTGAGGGAAA             |
| Mouse <i>Ccl2</i>             | forward         | TCACCTGCTGCTACTCATTCA           |
|                               | reverse         | CACTGTCACACTGGTCACTCC           |
| Mouse <i>Ccl3</i>             | forward         | TTCTCTGTACCATGACACTCTGC         |
|                               | reverse         | CGTGGAATCTTCCGGCTGTAG           |

|                    |         |                       |
|--------------------|---------|-----------------------|
| Mouse <i>Ccl4</i>  | forward | TGTCTGCCCTCTCTCTCCTCT |
|                    | reverse | AGCAAGGACGCTTCTCAGTGA |
| Mouse <i>Ccl5</i>  | forward | GCTGCTTTGCCTACCTCTCC  |
|                    | reverse | TCGAGTGACAAACACGACTGC |
| Mouse <i>Ccl6</i>  | forward | CCAAGACTGCCATTTTCATTC |
|                    | reverse | AAGCAATGACCTTGTTCCCA  |
| Mouse <i>Ccl7</i>  | forward | ATGGAAGTCTGCGCTGAAG   |
|                    | reverse | ACATGAGGTCTCCAGAGCTTT |
| Mouse <i>Ccl8</i>  | forward | ACGCTAGCCTTCACTCCAAAA |
|                    | reverse | TTCCAGCTTTGGCTGTCTCTT |
| Mouse <i>Ccl9</i>  | forward | TGGCATATCTGGCTTTGTCA  |
|                    | reverse | ATGGCTGTAGCTCAAGATGGT |
| Mouse <i>Ccl11</i> | forward | TCCACAGCGCTTCTATTCCT  |
|                    | reverse | GCAGTTCTTAGGCTCTGGGTT |
| Mouse <i>Ccl12</i> | forward | TCGAAGTCTTTGACCTCAACA |
|                    | reverse | GGGAACTTCAGGGGAAATA   |
| Mouse <i>Ccl19</i> | forward | ACTTGCACTTGGCTCCTGAA  |
|                    | reverse | AGTCTTCCGCATCATTAGCA  |
| Mouse <i>Ccl20</i> | forward | GCAAGCGTCTGCTCTTCCTT  |
|                    | reverse | TTAGGCTGAGGAGGTTACACA |
| Mouse <i>Ccl21</i> | forward | GATGATGACTCTGAGCCTCCT |
|                    | reverse | TTCTGCACCCAGCCTTCCT   |

|                     |         |                             |
|---------------------|---------|-----------------------------|
| Mouse <i>Ccl22</i>  | forward | TGGCAATTCAGACCTCTGATG       |
|                     | reverse | TTGCTGGAATGGCAGAAGAA        |
| Mouse <i>Ccl24</i>  | forward | TCATCTTGCTGCACGTCCTTT       |
|                     | reverse | TAAACCTCGGTGCTATTGCCA       |
| Mouse <i>Ccl25</i>  | forward | TCTCAGGACCAGAAAGGCATT       |
|                     | reverse | TGGCGGAAGTAGAATCTCACA       |
| Mouse <i>Ccl27</i>  | forward | AGGCTGAGTGAGCATGATGGA       |
|                     | reverse | TTGGCGTTCTAACCACCGA         |
| Mouse <i>Ccl28</i>  | forward | GCTGTGTGTGTGGCTTTTCAA       |
|                     | reverse | TACCTCTGAGGCTCTCATCCA       |
| Mouse <i>Cx3cl1</i> | forward | TGGCTTTGCTCATCCGCTATCAG     |
|                     | reverse | CGTCTGTGCTGTGTCGTCTCC       |
| Mouse <i>Cxcl1</i>  | forward | ACCCAAACCGAAGTCATAG         |
|                     | reverse | TTGTATAGTGTTGTCAGAAGC       |
| Mouse <i>Cxcl2</i>  | forward | ACTTCAAGAACATCCAGAG         |
|                     | reverse | CTTTCCAGGTCAGTTAGC          |
| Mouse <i>Cxcl3</i>  | forward | CAGCCACACTCCAGCCTA          |
|                     | reverse | CACAACAGCCCCTGTAGC          |
| Mouse <i>Cxcl4</i>  | forward | AGCGATGGAGATCTTAGCTGTGT     |
|                     | reverse | CCAGGCTGGTGATGTGCTTAA       |
| Mouse <i>Cxcl5</i>  | forward | AGTCAAGAATCATTGGTTGTTAACCTT |
|                     | reverse | TCCGGAGACAATGCAATAGTCA      |

|                     |         |                            |
|---------------------|---------|----------------------------|
| Mouse <i>Cxcl7</i>  | forward | GGAGTTCACTGTGCTGATGTGGA    |
|                     | reverse | CACAGATGAAGCAGCTGGTCAGTAA  |
| Mouse <i>Cxcl9</i>  | forward | ACAAATCCCTCAAAGACCTCAAACAG |
|                     | reverse | ATCTCCGTTCTTCAGTGTAGCAATG  |
| Mouse <i>Cxcl10</i> | forward | TGAAAGCGTTTAGCCAAAAAAGG    |
|                     | reverse | AGGGGAGTGATGGAGAGAGG       |
| Mouse <i>Cxcl12</i> | forward | CCTCCAAACGCATGCTTCA        |
|                     | reverse | ACTCTCCTCCCTTCCATTGCA      |
| Mouse <i>Cxcl13</i> | forward | CAGGCCACGGTATTCTGGA        |
|                     | reverse | CAGGGGGCGTAACTTGAATC       |
| Mouse <i>Cxcl14</i> | forward | GCTTCATCAAGTGGTACAAT       |
|                     | reverse | CTGGCCTGGAGTTTTTCTTTCCAT   |
| Mouse <i>Cxcl15</i> | forward | CTAGGCATCTTCGTCCGTCC       |
|                     | reverse | TTGGGCCAACAGTAGCCTTC       |
| Mouse <i>Cxcl16</i> | forward | AAACATTTGCCTCAAGCCAGT      |
|                     | reverse | GTTTCTCATTTCCTCAGCCT       |
| Mouse <i>Cxcl17</i> | forward | ATGAAGCTTCTAGCCTCTCCC      |
|                     | reverse | CTATAAGGGCAGCGCAAAGCTTGC   |
| Mouse <i>Tnfa</i>   | forward | ATGTCTCAGCCTCTTCTCATTC     |
|                     | reverse | GCTTGTCACTCGAATTTTGAGA     |
| Mouse <i>Il6</i>    | forward | CTCCCAACAGACCTGTCTATAC     |
|                     | reverse | CCATTGCACAACCTTTTTCTCA     |

|                     |         |                         |
|---------------------|---------|-------------------------|
| Human <i>ARB1</i>   | forward | AAAGGGACCCGAGTGTTC AAG  |
|                     | reverse | CGTCACATAGACTCTCCGCT    |
| Human <i>ARB2</i>   | forward | TCCATGCTCCGTCACACTG     |
|                     | reverse | ACAGAAGGCTCGAATCTCAAAG  |
| Human <i>ARRDC1</i> | forward | AGTTCCTGCTTCCTGCCACT    |
|                     | reverse | GGCTGCACTTGTGATCCTTG    |
| Human <i>ARRDC2</i> | forward | GAGGTGGTAGCCGACACTGA    |
|                     | reverse | CGGTAGCGGAACTCTTGGAT    |
| Human <i>ARRDC3</i> | forward | TTTGCCACTTGTCATCGGTA    |
|                     | reverse | GGTGCTTCAGGTCTTTCAGG    |
| Human <i>ARRDC4</i> | forward | TTGATGCTCGAACTGCCATT    |
|                     | reverse | TGGTGCTTCAGGCTGCTCT     |
| Human <i>ARRDC5</i> | forward | CCGTTGCTGCTGTCCGTGAG    |
|                     | reverse | CTGAGGCGCTGGTGATGATGATG |
| Human <i>TXNIP</i>  | forward | CCTGAAGATCACCGATTGGA    |
|                     | reverse | GGTGGTGGCATGAACTTGAA    |
| Human <i>CXCL2</i>  | forward | CTCAAGAATGGGCAGAAAGC    |
|                     | reverse | CTTCAGGAACAGCCACCAAT    |
| Human <i>SP1</i>    | forward | CCAATGGCTGGCAGATCA      |
|                     | reverse | CCACCAGAGACTGTGCGATT    |

- 
- 1 For the probes, a FAM fluorescent reporter is coupled to the 5' end, and a TAMRA quencher is coupled to the 3'
  - 2 end.



1 SupplementalTable 4.siRNAsused in the present study

| Name     |           | Sequence 5'→3'         |
|----------|-----------|------------------------|
| siARRDC3 | sense     | GCUGGACUGAAUCUAGAAATT  |
|          | antisense | UUUCUAGAUUCAGUCCAGCTT  |
| siPAR1   | sense     | GGUCUGAAUUGUGUCGCUUTT  |
|          | antisense | AAGCGACACAAUUCAGACCTT  |
| siSP1#1  | sense     | CCUCACAGCCACACAACUUTT  |
|          | antisense | AAGUUGUGUGGCUGUGAGGTT  |
| siSP1#2  | sense     | CAUACCAGGUGCAAACCAATT  |
|          | antisense | UUGGUUUGCACCUUGGUAUGTT |

2

3
